# Supplementary material for: Analysis of nifH‐RNA reveals phylotypes related to Geobacter and Cyanobacteria as important functional components of the N2‐fixing community depending on depth and agricultural use of soil
Source: PubMed Central journal article supplement (PMC5635172; doi:10.1002/mbo3.502), 2017-08-01

# Figure S2

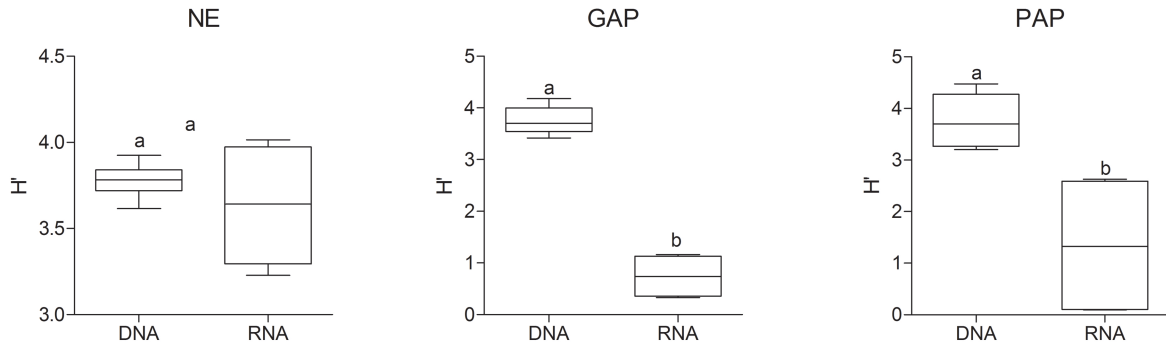

Supplement: MBO3-6-na-s002.pdf [file MBO3-6-na-s002.pdf]
