# Supplementary material for: Analysis of nifH‐RNA reveals phylotypes related to Geobacter and Cyanobacteria as important functional components of the N2‐fixing community depending on depth and agricultural use of soil
Source: PubMed Central journal article supplement (PMC5635172; doi:10.1002/mbo3.502), 2017-08-01
Supplement: MBO3-6-na-s003.pdf [file MBO3-6-na-s003.pdf]

Figure S3

**A**  
RNA\_NE 10 cm  
RNA\_NE 20 cm  
RNA\_PAP 10 cm  
RNA\_PAP 20 cm  
100 bp Marker

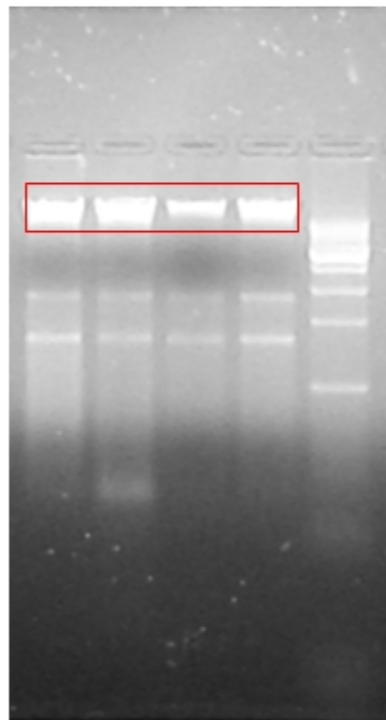

**B**  
RNA\_NE 10 cm  
RNA\_NE 20 cm  
RNA\_PAP 10 cm  
RNA\_PAP 20 cm  
100 bp Marker

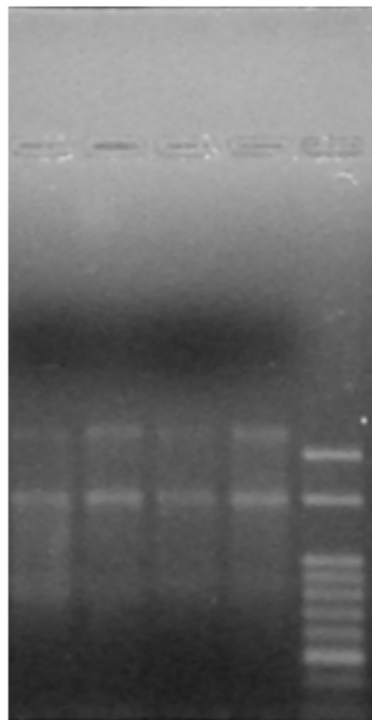

**C**  
100 bp Marker  
RNA\_NE 10 cm + RT-PCR +  
Nested PCR  
DNA\_NE 10 cm + Nested PCR  
RNA\_NE 10 + RT-PCR (without RT) +  
Nested PCR  
Nested PCR without template

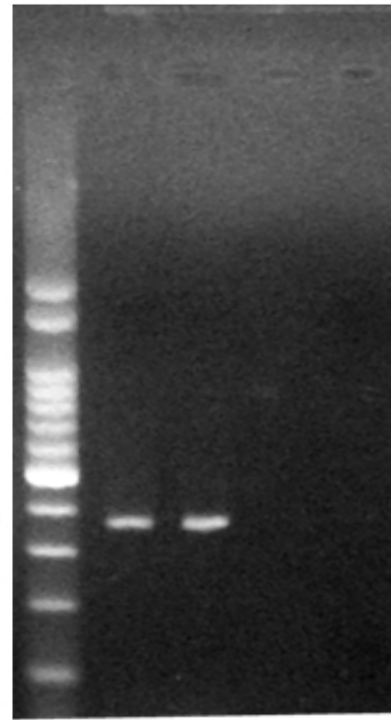

359 bp →
