# Supplementary material for: Analysis of nifH‐RNA reveals phylotypes related to Geobacter and Cyanobacteria as important functional components of the N2‐fixing community depending on depth and agricultural use of soil
Source: PubMed Central journal article supplement (PMC5635172; doi:10.1002/mbo3.502), 2017-08-01

Figure S4

**A**

1 2 3 4 5 6 7 8 9 MW

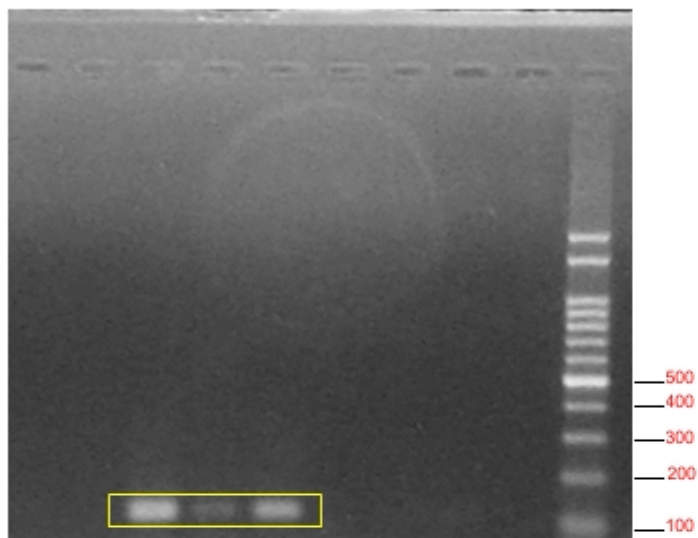

**B**

1 2 3 4 5 6 7 8 9 10 11 12 13 14 15 MW

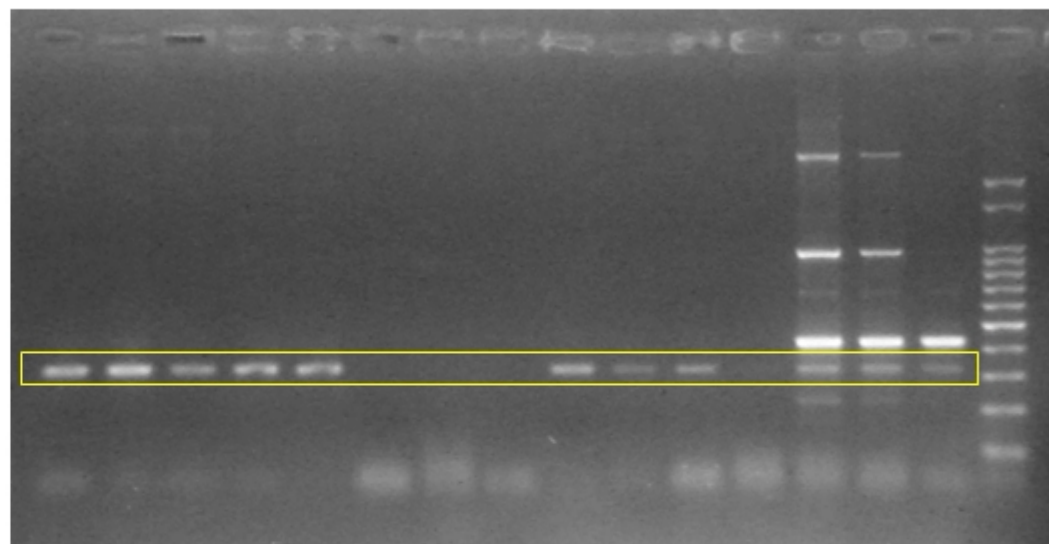

**C**

1 2 3 4 MW 5

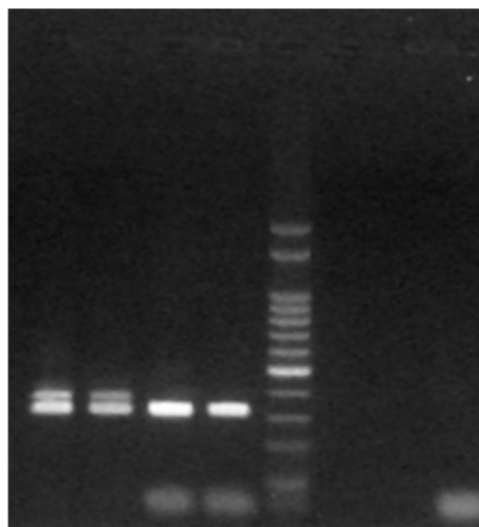

**D**

1 2 3 4 5 6 7 8 9 MW 10

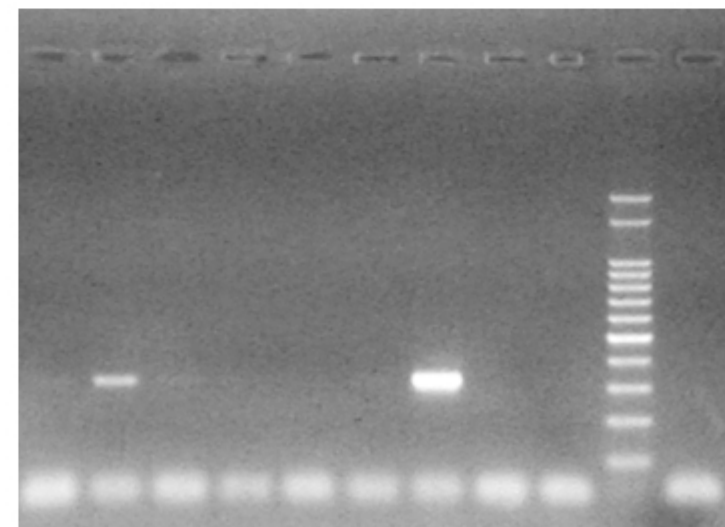

Supplement: MBO3-6-na-s004.pdf [file MBO3-6-na-s004.pdf]
